# Supplementary material
Source: publisher figshare collection journal article supplement (https://karger.figshare.com/articles/dataset/_/6796895)
Supplement: Supplementary file 1 [file 1]

|            |            |            |            |            |            |            |            |            |       |
|------------|------------|------------|------------|------------|------------|------------|------------|------------|-------|
| #Ateles    | GTATATCTAG | AAGACCCCAT | CGTCTCAGCC | CAAAATCTCC | TGAAACTGAT | AAGCAACTTC | AGCAAAGTCT | CAGGATATAA | [ 80] |
| #Alouatta  | .....      | .....      | .....      | .....      | ...T....   | .....      | .....      | .....C..   | [ 80] |
| #Lagothrix | .....      | .....      | .....      | .....      | ....T...   | .....      | .....      | .....      | [ 80] |
| #Saguinus  | ....C....  | .....      | .AC.....   | ....G....  | ..C.....   | .....      | .....      | .....      | [ 80] |
| #Saimiri   | .....G.    | .....      | .A.....    | .....      | .....      | ..A.....   | .....      | .....C..   | [ 80] |
|            |            |            |            |            |            |            |            |            |       |
| #Ateles    | AATCAATGTG | CAAAAATCAC | AAGCATTCCT | ATACACCAAT | AACAGACTTA | AAGACAGCCA | AATCAAGAAC | CAACTGCCAT | [160] |
| #Alouatta  | .....      | .....      | .....      | .....      | .....      | ...G....   | .....      | .....      | [160] |
| #Lagothrix | .....      | .....      | .....      | .....      | .....      | .....      | .....      | .....      | [160] |
| #Saguinus  | .....      | .....      | .....      | .....      | .....      | ...G.A...  | .....      | G.....     | [160] |
| #Saimiri   | ....C...   | .....      | .....      | ....G.     | ..T.....C  | ...G....   | .....      | G.....     | [160] |
|            |            |            |            |            |            |            |            |            |       |
| #Ateles    | TCACAATCGC | TACAAAGAGA | ATAAAATACC | TAGGAATACA | ACTAACAAGG | AACGTAAAGG | ACCTCTTCAA | GGAGAACTAC | [240] |
| #Alouatta  | .....T..   | .....      | ..C.....   | .....      | .....      | ...A.....  | .....      | .....      | [240] |
| #Lagothrix | .....T..   | .....      | .....      | .....      | .....      | .....      | .....      | .....      | [240] |
| #Saguinus  | .....T..   | .....A.    | .....      | .....      | ...C..T... | ..T...G..  | .....T..   | ...A.....  | [240] |
| #Saimiri   | .....T..   | .....      | ....G....  | .....      | .....      | .....      | .....      | .....      | [240] |
|            |            |            |            |            |            |            |            |            |       |
| #Ateles    | AAACCACTGC | TCAATGAAAT | AAGAGAGGAC | ACAAACAGAT | GGAGAAATAT | TCCATGTTCA | TGGCTAGGAA | GAATCAATAT | [320] |
| #Alouatta  | ....G....  | .....      | .....      | .....      | .....      | .....      | .....      | .....      | [320] |
| #Lagothrix | .....      | .....      | .....      | .....      | .....      | .....      | .....      | .....      | [320] |
| #Saguinus  | ...A....   | ...C....   | .....      | .....      | .....C..   | .....G     | ...T.....  | .....      | [320] |
| #Saimiri   | ..G...T... | ...C....   | .....T     | .....      | .....C..   | .....      | ...T.....  | .....C..   | [320] |
|            |            |            |            |            |            |            |            |            |       |
| #Ateles    | TGTCAAAATG | GCCATACTGC | CCAAAGTAAT | TTACAGATTC | AACGCTATCC | CTATCAAGCT | ACCAATGACC | TTCTTTGAAG | [400] |
| #Alouatta  | C..G.....  | .....      | .....      | .....      | .....      | .....      | .....      | .....C.C.. | [400] |
| #Lagothrix | .....      | .....      | .....      | .....      | .....      | .....      | .....      | ....CC...  | [400] |
| #Saguinus  | C..G.....  | ..T.....   | .....      | ...C.A..   | ..T.....   | .C....A..  | ...T...AT  | ....CAC..  | [400] |
| #Saimiri   | C..G.....  | .....      | .....      | .....      | .....T.    | .C.....    | .....      | ....CAC..  | [400] |
|            |            |            |            |            |            |            |            |            |       |
| #Ateles    | AACTGGAAAA | AACCACCTTA | AACTTCATAT | GGAACCAAAA | GAGAGCCCGC | ATAGCCAAGT | CAATTCTAAG | CAAAAAGAAC | [480] |
| #Alouatta  | .....      | .....      | .....      | .....      | .....      | .....      | .....      | .....      | [480] |
| #Lagothrix | .....      | .....      | .....      | .....      | .....      | .....      | .....      | .....      | [480] |
| #Saguinus  | .....      | .....A.G   | ..T.....   | .....      | A.....     | .....      | .....      | .....      | [480] |
| #Saimiri   | .....      | ..A.....   | .....      | .....      | .....      | .....      | .....      | .....      | [480] |
|            |            |            |            |            |            |            |            |            |       |
| #Ateles    | AAAGCTGGAG | GCATCACACT | CCCGGACTTC | AAATTATACT | ACAAAGCTAC | AGTAATCAAA | ACAGCATGGT | ACTGGTACCA | [560] |
| #Alouatta  | .....      | ...T....   | A.....     | ...C.....  | .....      | .....      | .....      | .....      | [560] |
| #Lagothrix | .....      | .....      | .....      | ...C.....  | .....      | .....      | .....      | .....      | [560] |
| #Saguinus  | .C...G.... | .....G..   | A..A.....  | ...C.....  | ...G....   | .....      | .....      | .....      | [560] |
| #Saimiri   | ....A....  | .....      | A.....     | ...C.....  | ...G....   | .....      | .....      | .....      | [560] |
