# Supplementary material
Source: publisher figshare collection journal article supplement (https://karger.figshare.com/articles/dataset/_/6796895)
Supplement: Supplementary file 3 [file 1]

|             |            |            |            |            |            |            |            |             |       |
|-------------|------------|------------|------------|------------|------------|------------|------------|-------------|-------|
| #L1_nwm_old | TATCATCTCA | CGCCAGTTAG | AATGGCGATC | ATTAAAAAAT | CGGGAGACAA | CAGATGCTGG | AGAGGATGTG | GAGAAATAGG  | [ 80] |
| #Alouatta   | ..C..C.... | .....      | .....      | .....      | .T.....    | .....      | ..G.....   | .....       | [ 80] |
| #L1_nwm_mod | ..C.....   | .....      | .....      | .....      | .T.....    | .....      | .....      | .....       | [ 80] |
| #Saguinus   | ..C.....   | .A.....    | .....      | .....      | .T.....G   | .....      | .....      | .....       | [ 80] |
| #Saimiri    | ..C.....   | .A.....    | .....      | .....      | ....A....  | .....      | .....      | .....       | [ 80] |
|             |            |            |            |            |            |            |            |             |       |
| #L1_nwm_old | AACACTTTTA | CACAGTTGGT | GGGAGTGTA  | ATTAGTTCAA | CCATTGTGGA | AGACAGTGTG | GCGATTTCTC | AAGGATCTAG  | [160] |
| #Alouatta   | .....C...  | ...T.....  | .....      | .....      | .....      | .....      | .....C...  | .....C....  | [160] |
| #L1_nwm_mod | .....      | ...T.....  | .....      | .....      | .....      | .....      | .....C...  | .....C....  | [160] |
| #Saguinus   | .....C...  | ...T.....  | .....      | .....      | .....      | .....      | .....C...  | ..G...C.... | [160] |
| #Saimiri    | .....      | ...T.....  | ....A....  | ....A....  | .....      | .....      | .....C...  | .....C...A  | [160] |
|             |            |            |            |            |            |            |            |             |       |
| #L1_nwm_old | AAATAGAAAT | TCCATTTGAC | CCAGCAATCC | CACTATTGGG | TATATACCCA | AAGAACTATA | AATCGTTCTA | CTATAAAGAC  | [240] |
| #Alouatta   | .....      | .....      | .....      | ..T..C.... | .....T...  | ...G.T.... | ....A..... | .....G...   | [240] |
| #L1_nwm_mod | .....      | .....      | .....      | ..T..C.... | .....T...  | ...G.T.... | ....A..... | .....G...   | [240] |
| #Saguinus   | .....      | .....      | .....      | ..T..C.... | ...C..T... | ...G.....  | .....      | .....G...   | [240] |
| #Saimiri    | .....      | C.....     | .....      | ..T..C.... | .....T...  | ...G.T.... | ....A..... | ...C..G...  | [240] |
|             |            |            |            |            |            |            |            |             |       |
| #L1_nwm_old | ACATGCACAT | GTATGTTTAT | TGCAGCCCTG | TGTACAATAG | CAAAGACCTG | GAACCAACCC | AAATGCCCAT | CAATGATAGA  | [320] |
| #Alouatta   | .....C     | .A.....    | .....A.A.  | .T.....    | .....      | .....      | .....      | ..G.....    | [320] |
| #L1_nwm_mod | .....C     | .A.....    | .....A..   | .T.....    | .....      | .....      | .....      | ..G.....    | [320] |
| #Saguinus   | .....C     | .A.....    | .....A..   | .T.....    | .....      | .....      | .....A     | ..G.....    | [320] |
| #Saimiri    | ..G.....C  | .A.....    | .....A..   | .T.....    | .....      | .....      | .....A     | ..G.....    | [320] |
|             |            |            |            |            |            |            |            |             |       |
| #L1_nwm_old | CTGGACAAAG | AAAATGTGGT | ACATATAC   | [348]      |            |            |            |             |       |
| #Alouatta   | .....GC.   | .....C     | .....      | [348]      |            |            |            |             |       |
| #L1_nwm_mod | .....GG.   | .....C     | .....      | [348]      |            |            |            |             |       |
| #Saguinus   | .....TGG.  | .....C     | .....      | [348]      |            |            |            |             |       |
| #Saimiri    | .....T.GG. | .....      | .....      | [348]      |            |            |            |             |       |

NB: the L1\_nwm\_mod sequence is a consensus based on Atelinae sequences
